# Supplementary material for: Synergistic impact of nanoplastics and nanopesticides on Artemia salina and toxicity analysis
Source: Royal Society of Chemistry journal article supplement (doi:10.1039/d4na00013g), 2024-01-01
Supplement: d4na00013g1.pdf [file d4na00013g1.pdf]

**Synergistic impact of nanoplastics and nanopesticides on *Artemia salina*  
and toxicity analysis**

Mahalakshmi Kamalakannan<sup>a</sup>, Durgalakshmi Rajendran<sup>a</sup>, John Thomas<sup>a</sup>, Natarajan  
Chandrasekaran<sup>a\*</sup>

<sup>a</sup>Centre for Nanobiotechnology, Vellore Institute of Technology.

Vellore - 632014, Tamil Nadu, India

Corresponding author,

Prof. Dr. Natarajan Chandrasekaran, Ph.D. D.Sc. FRES., FRSB., FRSC

Senior Professor

Centre for Nanobiotechnology,

Vellore Institute of Technology,

Vellore - 632014, Tamil Nadu, India

**Email:** [nchandrasekaran@vit.ac.in](mailto:nchandrasekaran@vit.ac.in), [nchandra40@hotmail.com](mailto:nchandra40@hotmail.com)

<http://orcid.org/0000-0002-0586-134X>

Tel.+91            416            2202624.            Fax.            +91            416            2243092

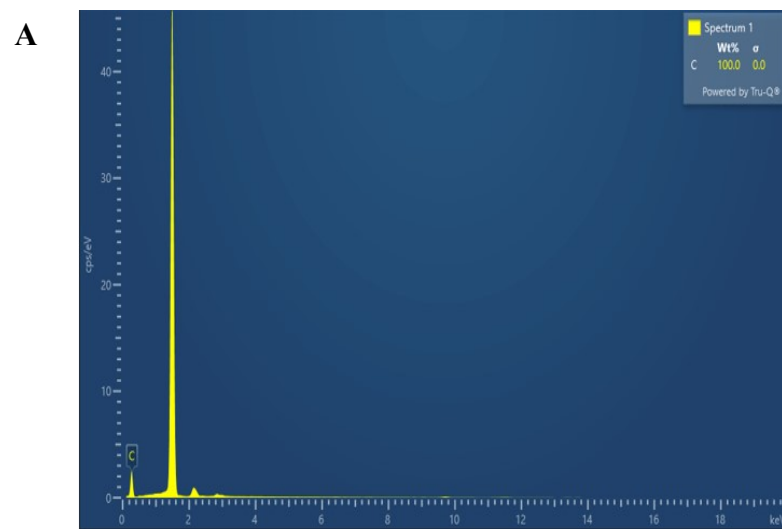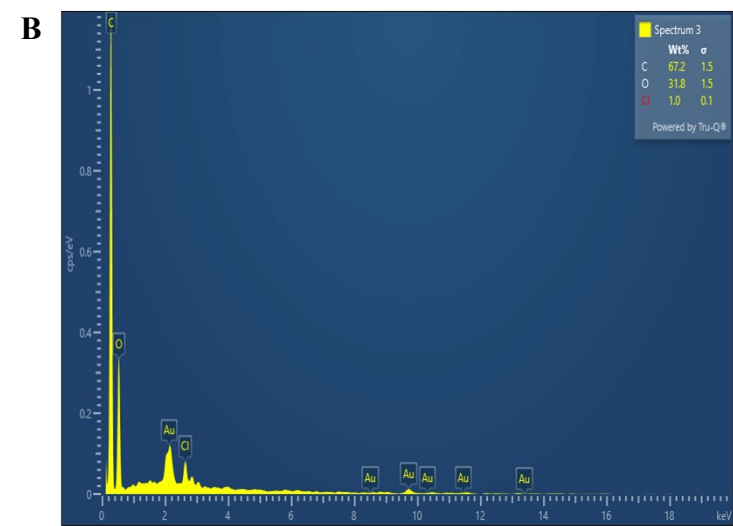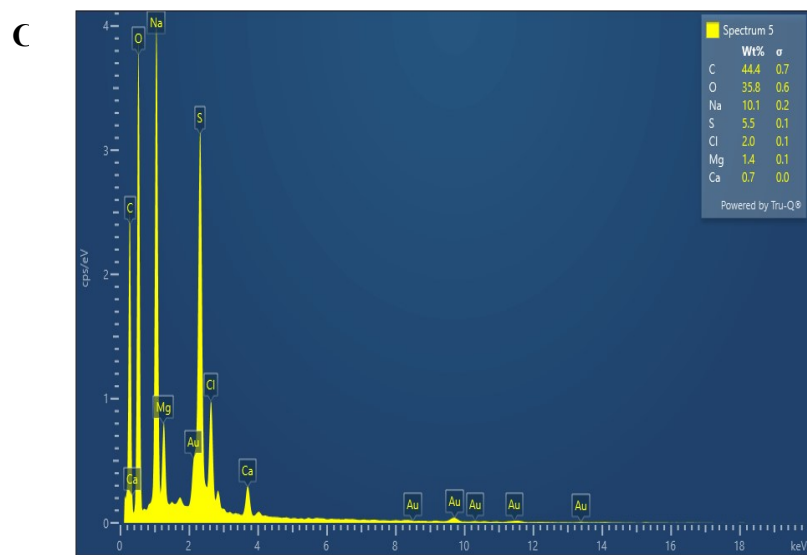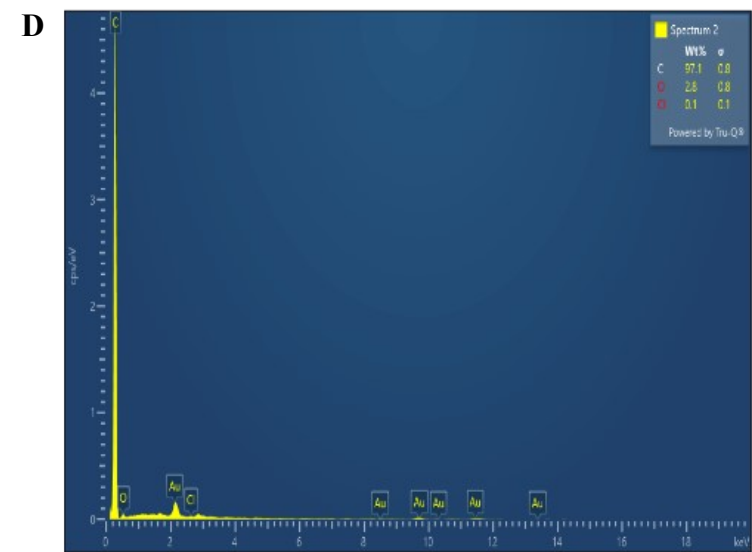

**Fig.S1** EDX analysis of (A) PSNPs 100 nm, (B) NPER, (C) complex PSNPs + NPER + seawater, (D) PSNPs + NPER +milli-Q water EDX.

## 24.24 spectrum

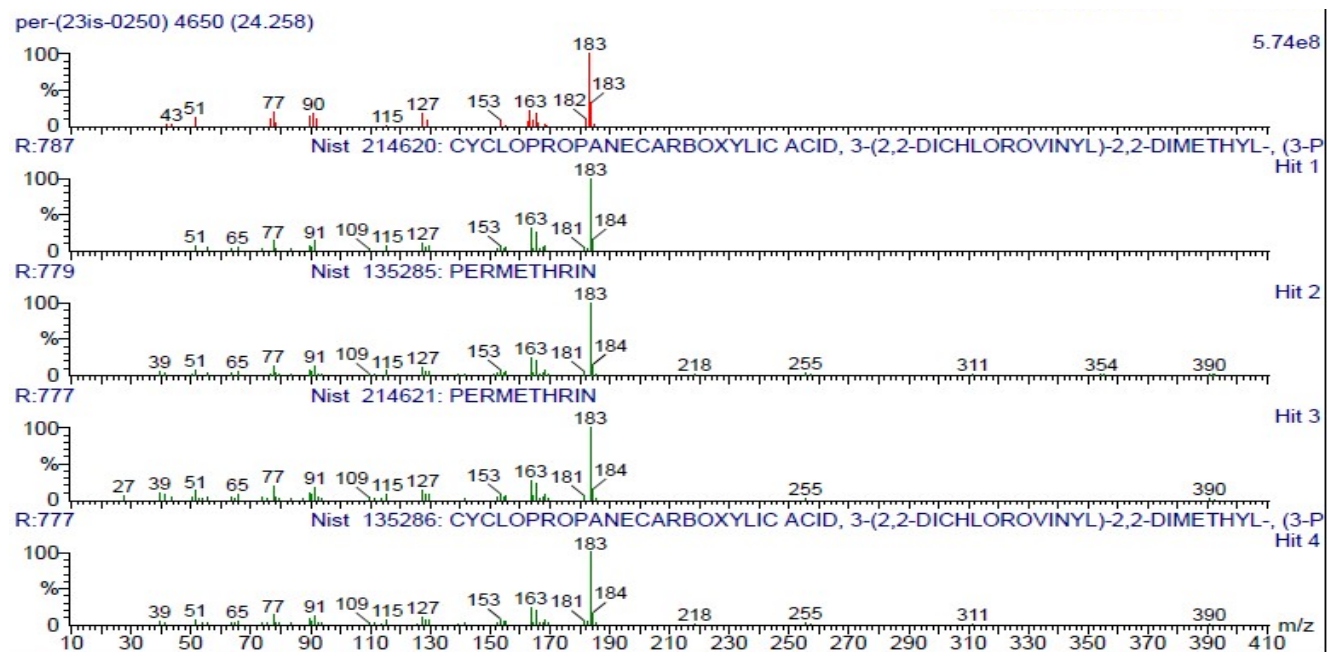

Fig.S2a GC-MS analysis spectrum for nanopermethrin.

## 24.06 spectrum

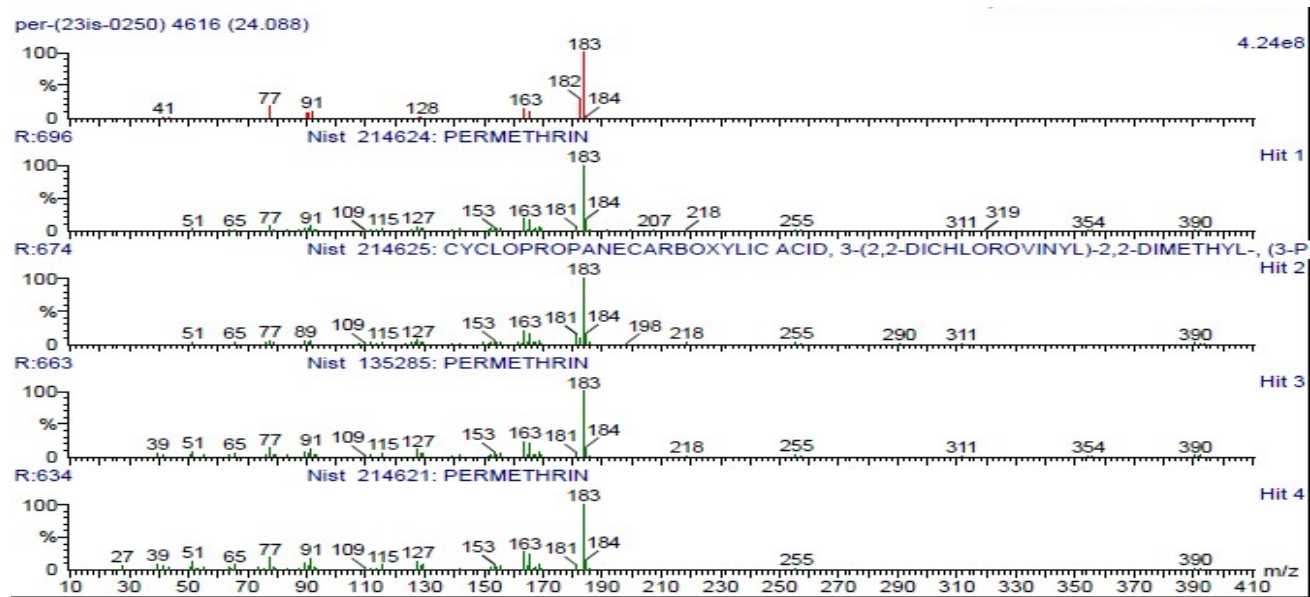

Fig.S2b GC-MS analysis spectrum for nanopermethrin.

**Control**

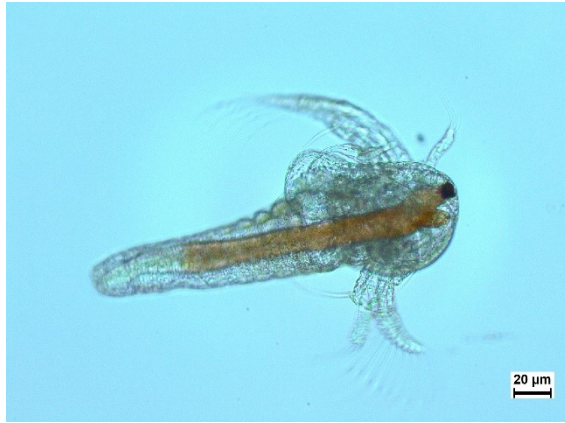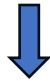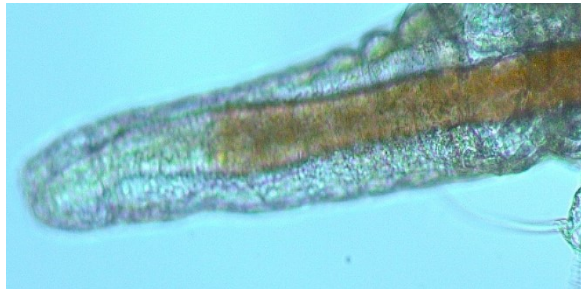

**NPER treated**

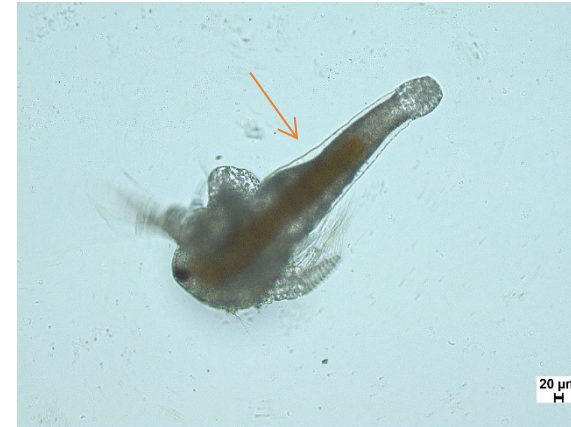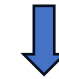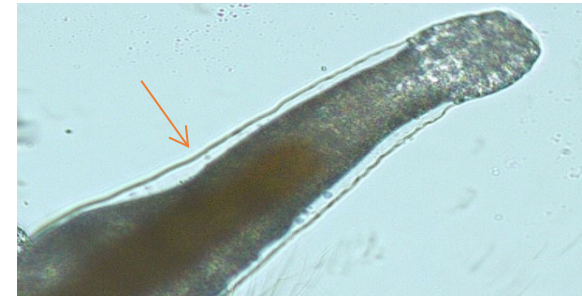

**Fig.S3** The life stage and morphological changes in *Artemia salina* (fig 9 (3 d, e)) NPER, treated *Artemia salina* gut region shrink region magnified images are shown.
