# Supplementary material for: Synergistic impact of nanoplastics and nanopesticides on Artemia salina and toxicity analysis
Source: Royal Society of Chemistry journal article supplement (doi:10.1039/d4na00013g), 2024-01-01

# supplementary file (2)

## *Artemia salina* Swimming performance

CONTROL

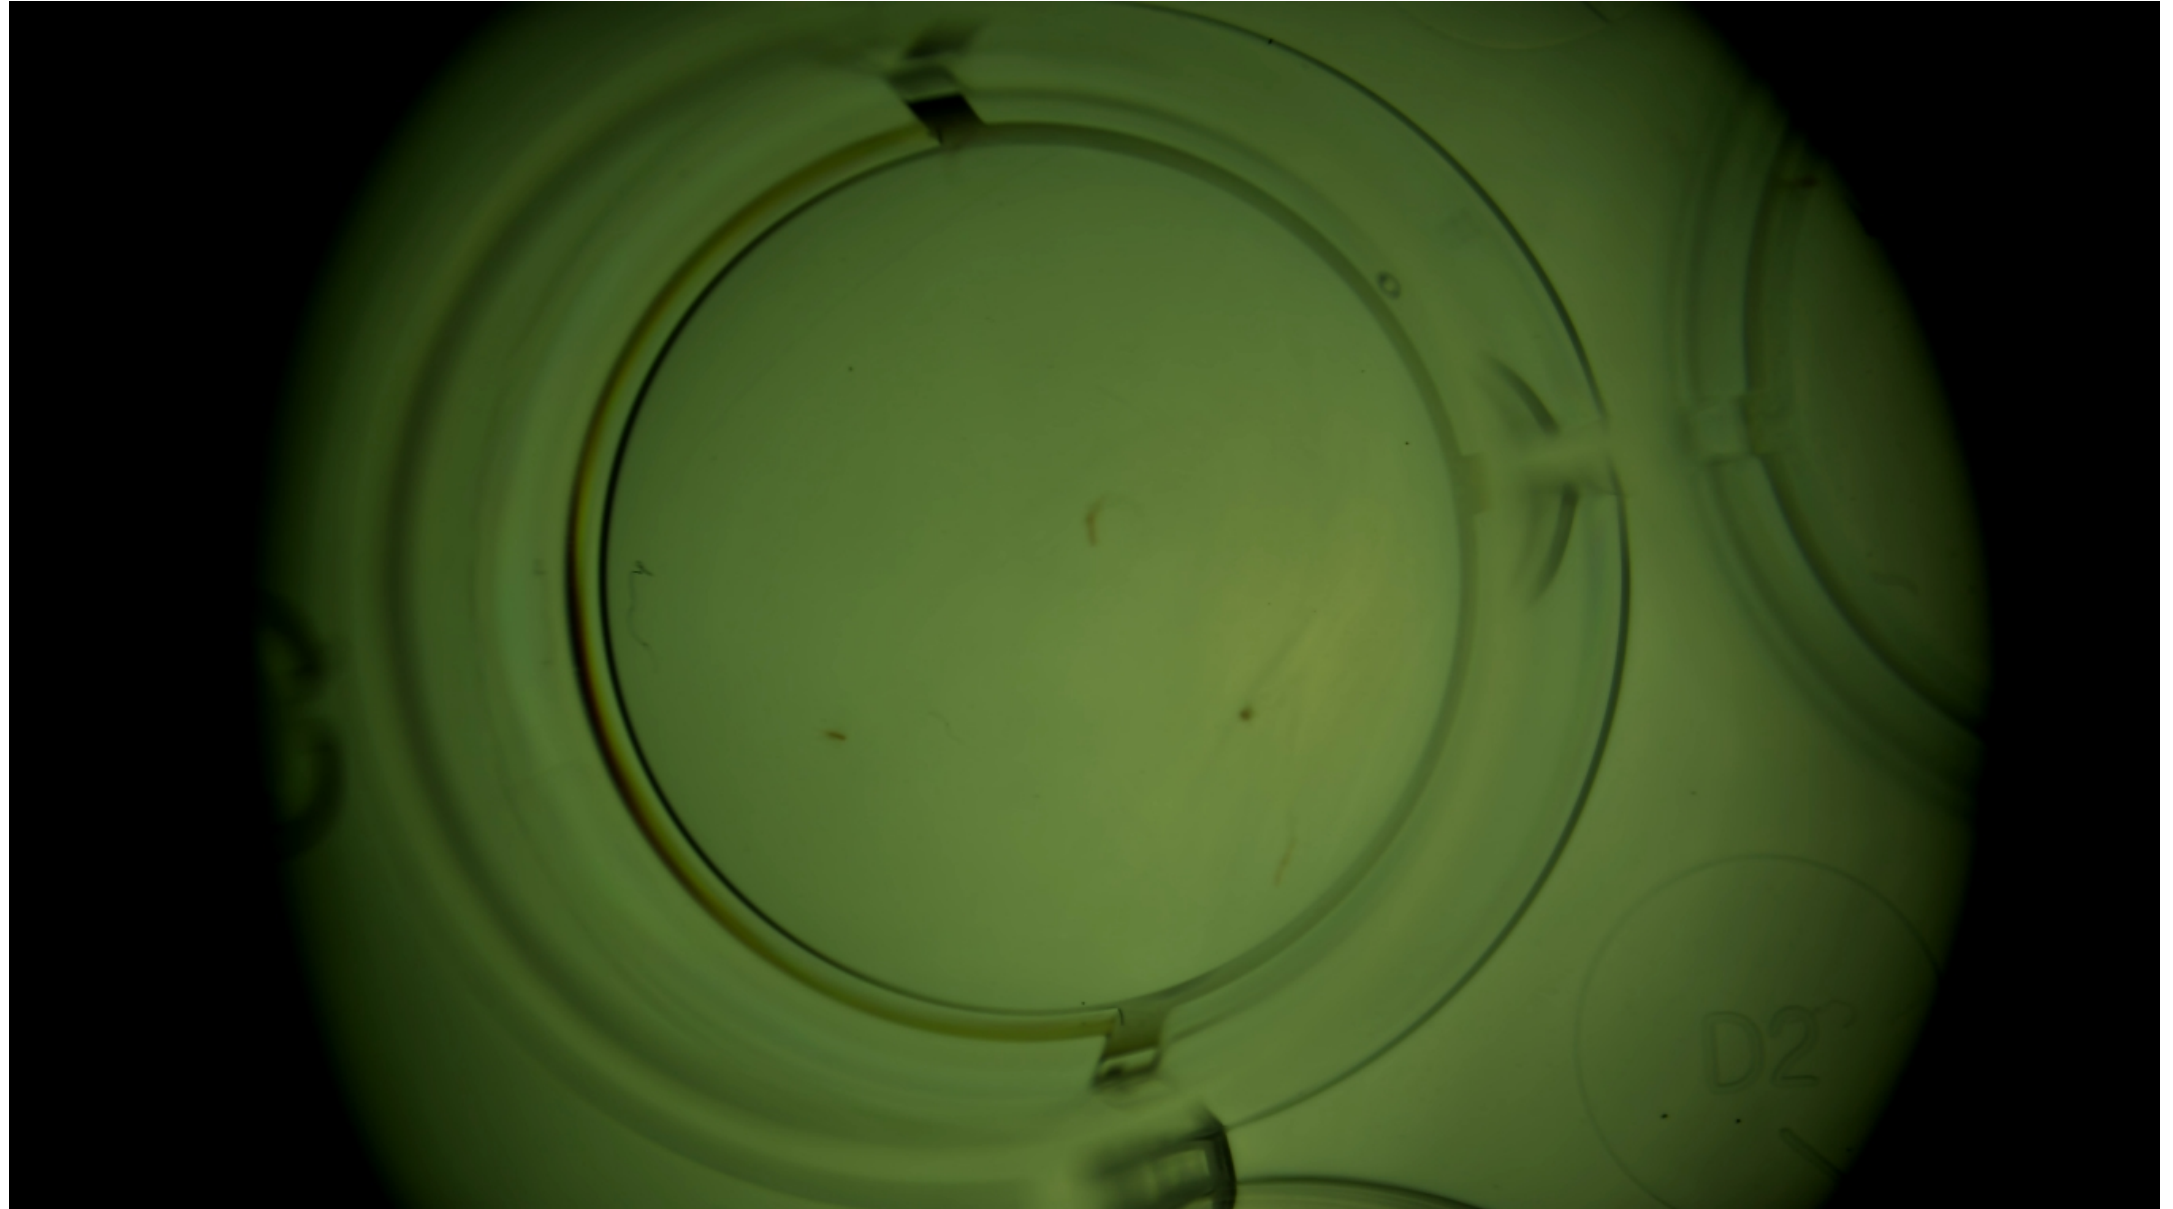

PSNPs

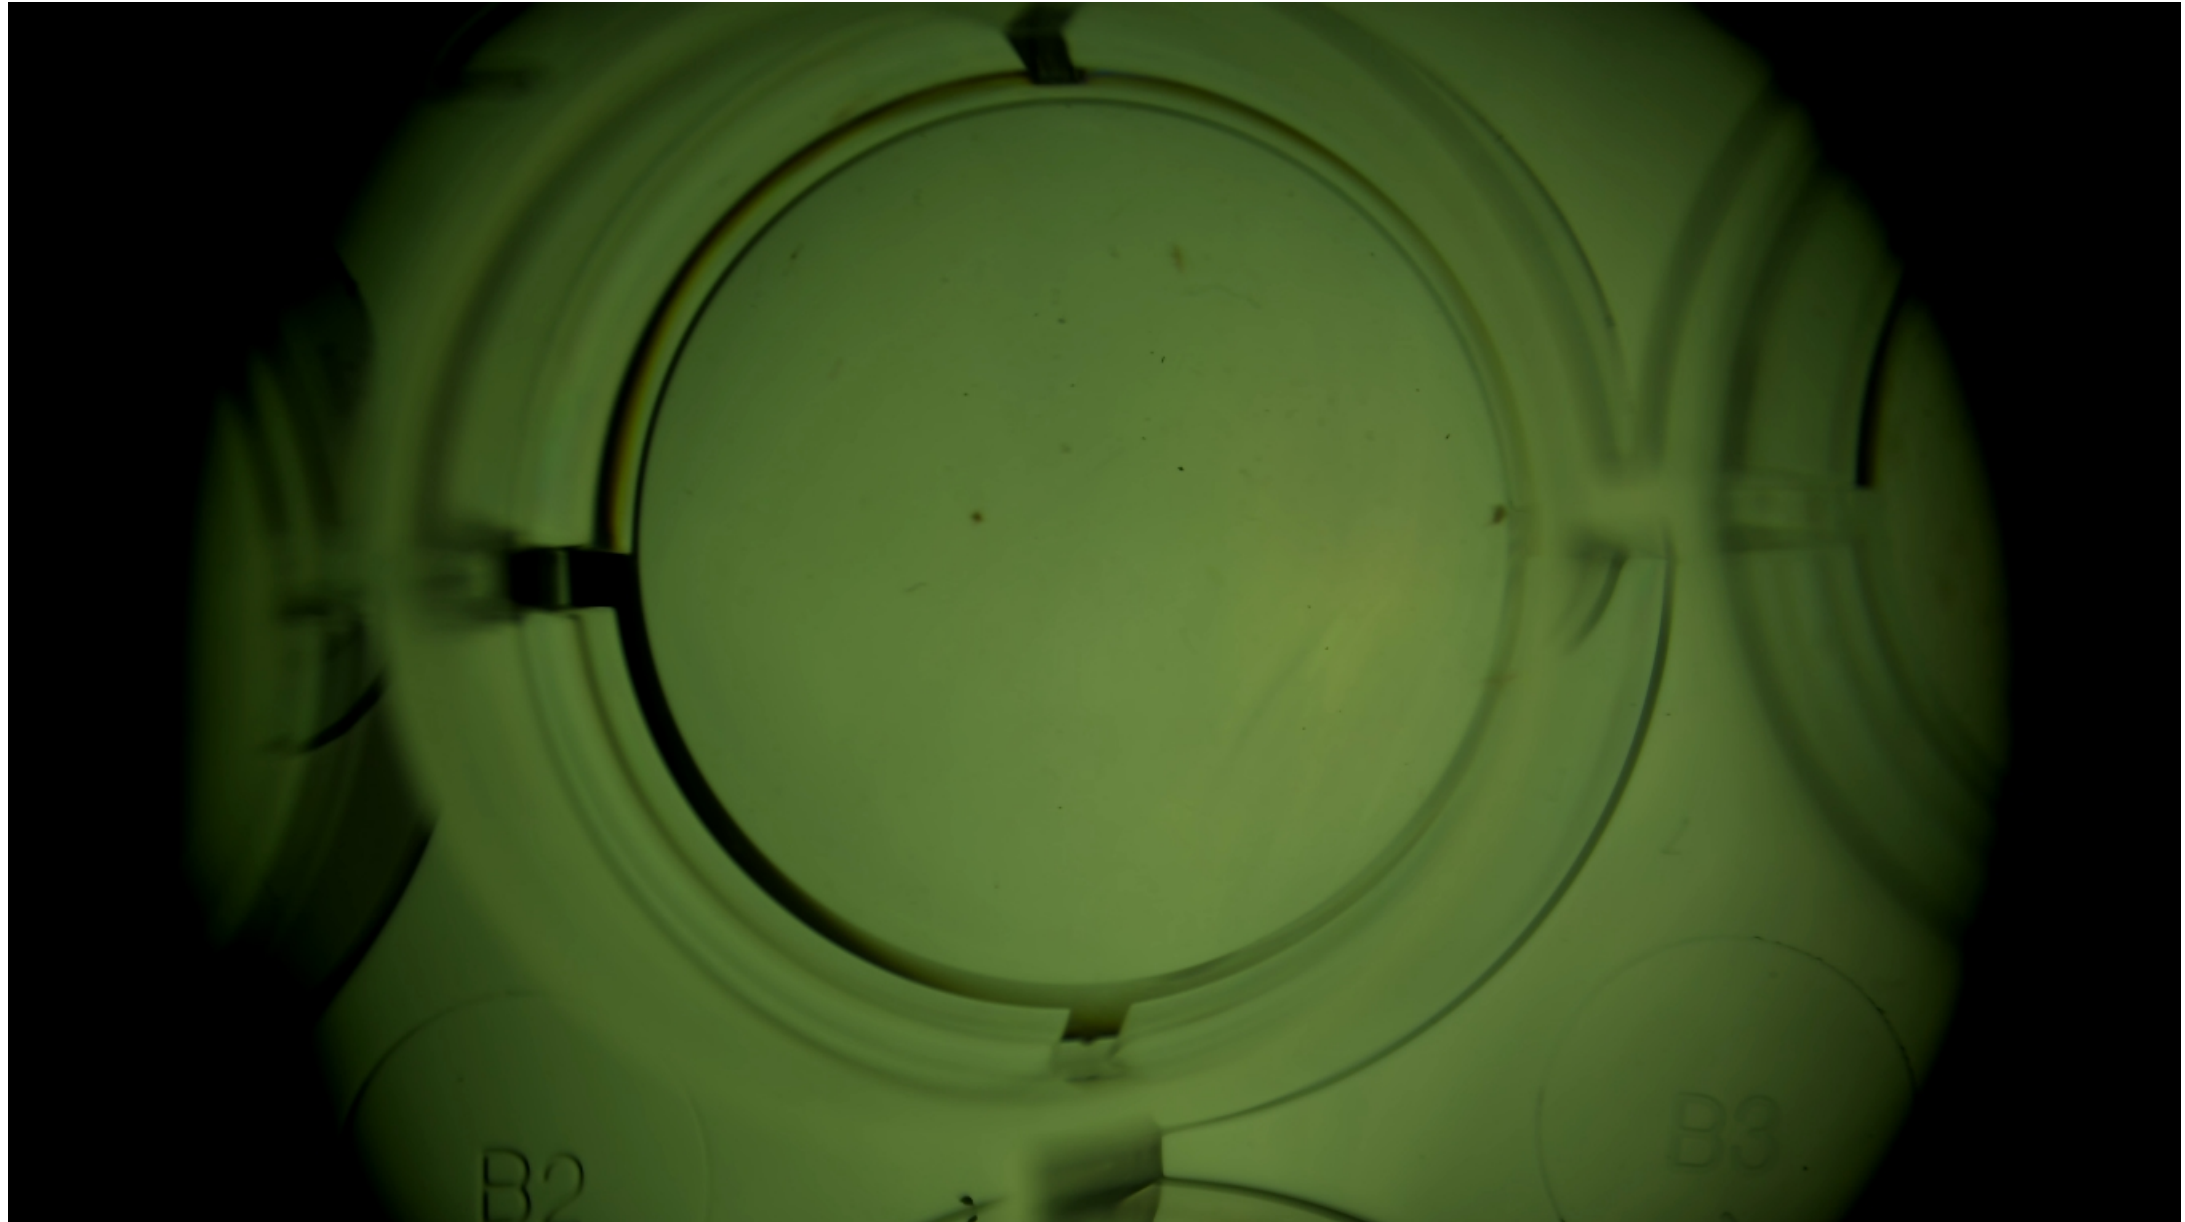

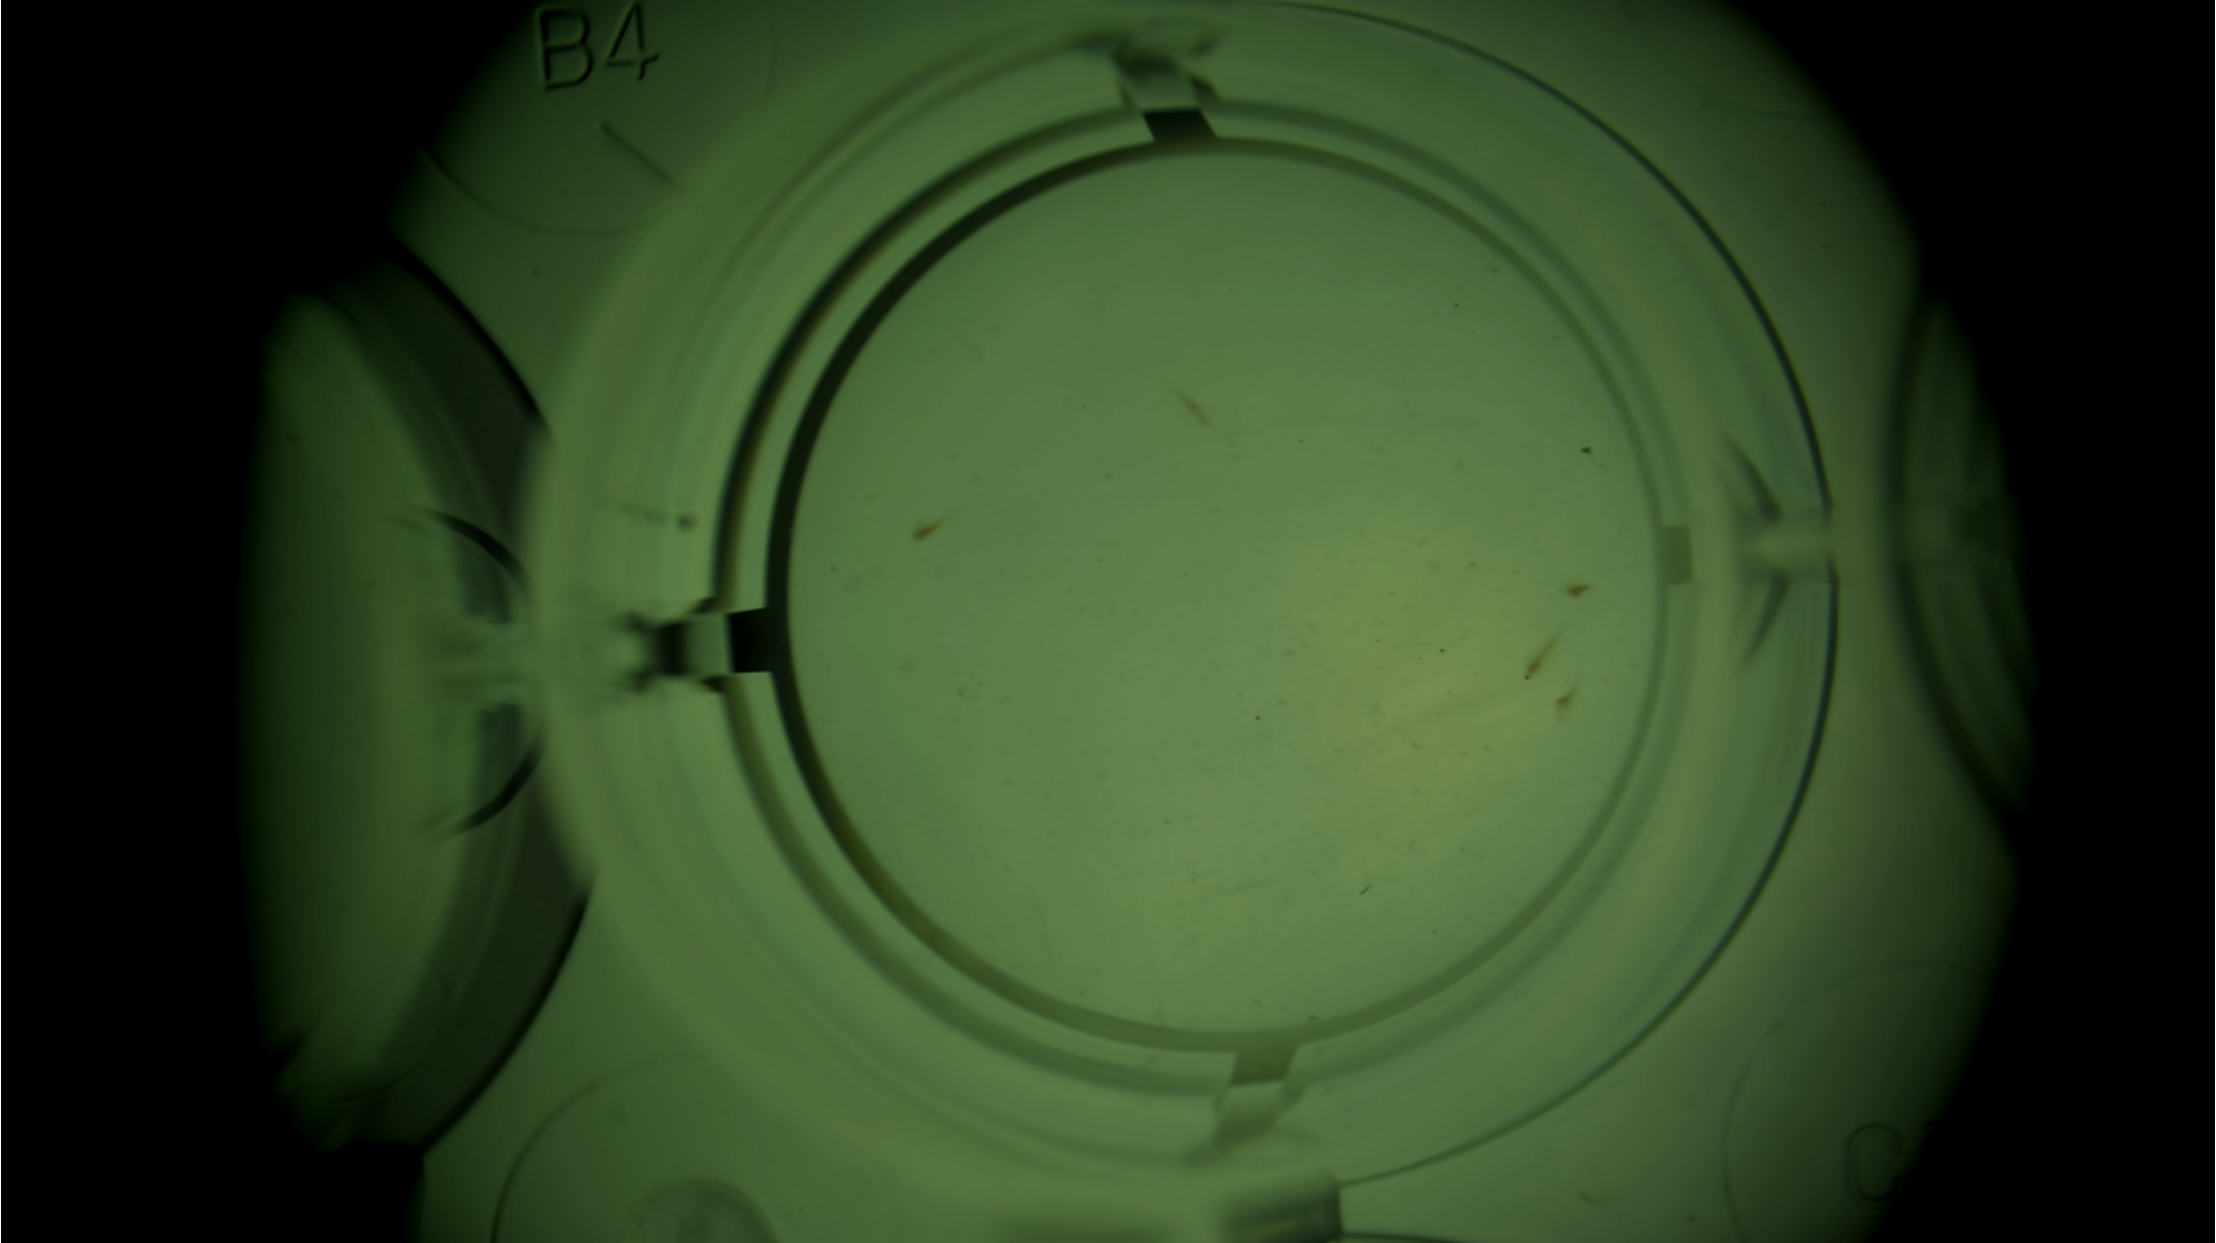

Combination (PSNPs+NPER)

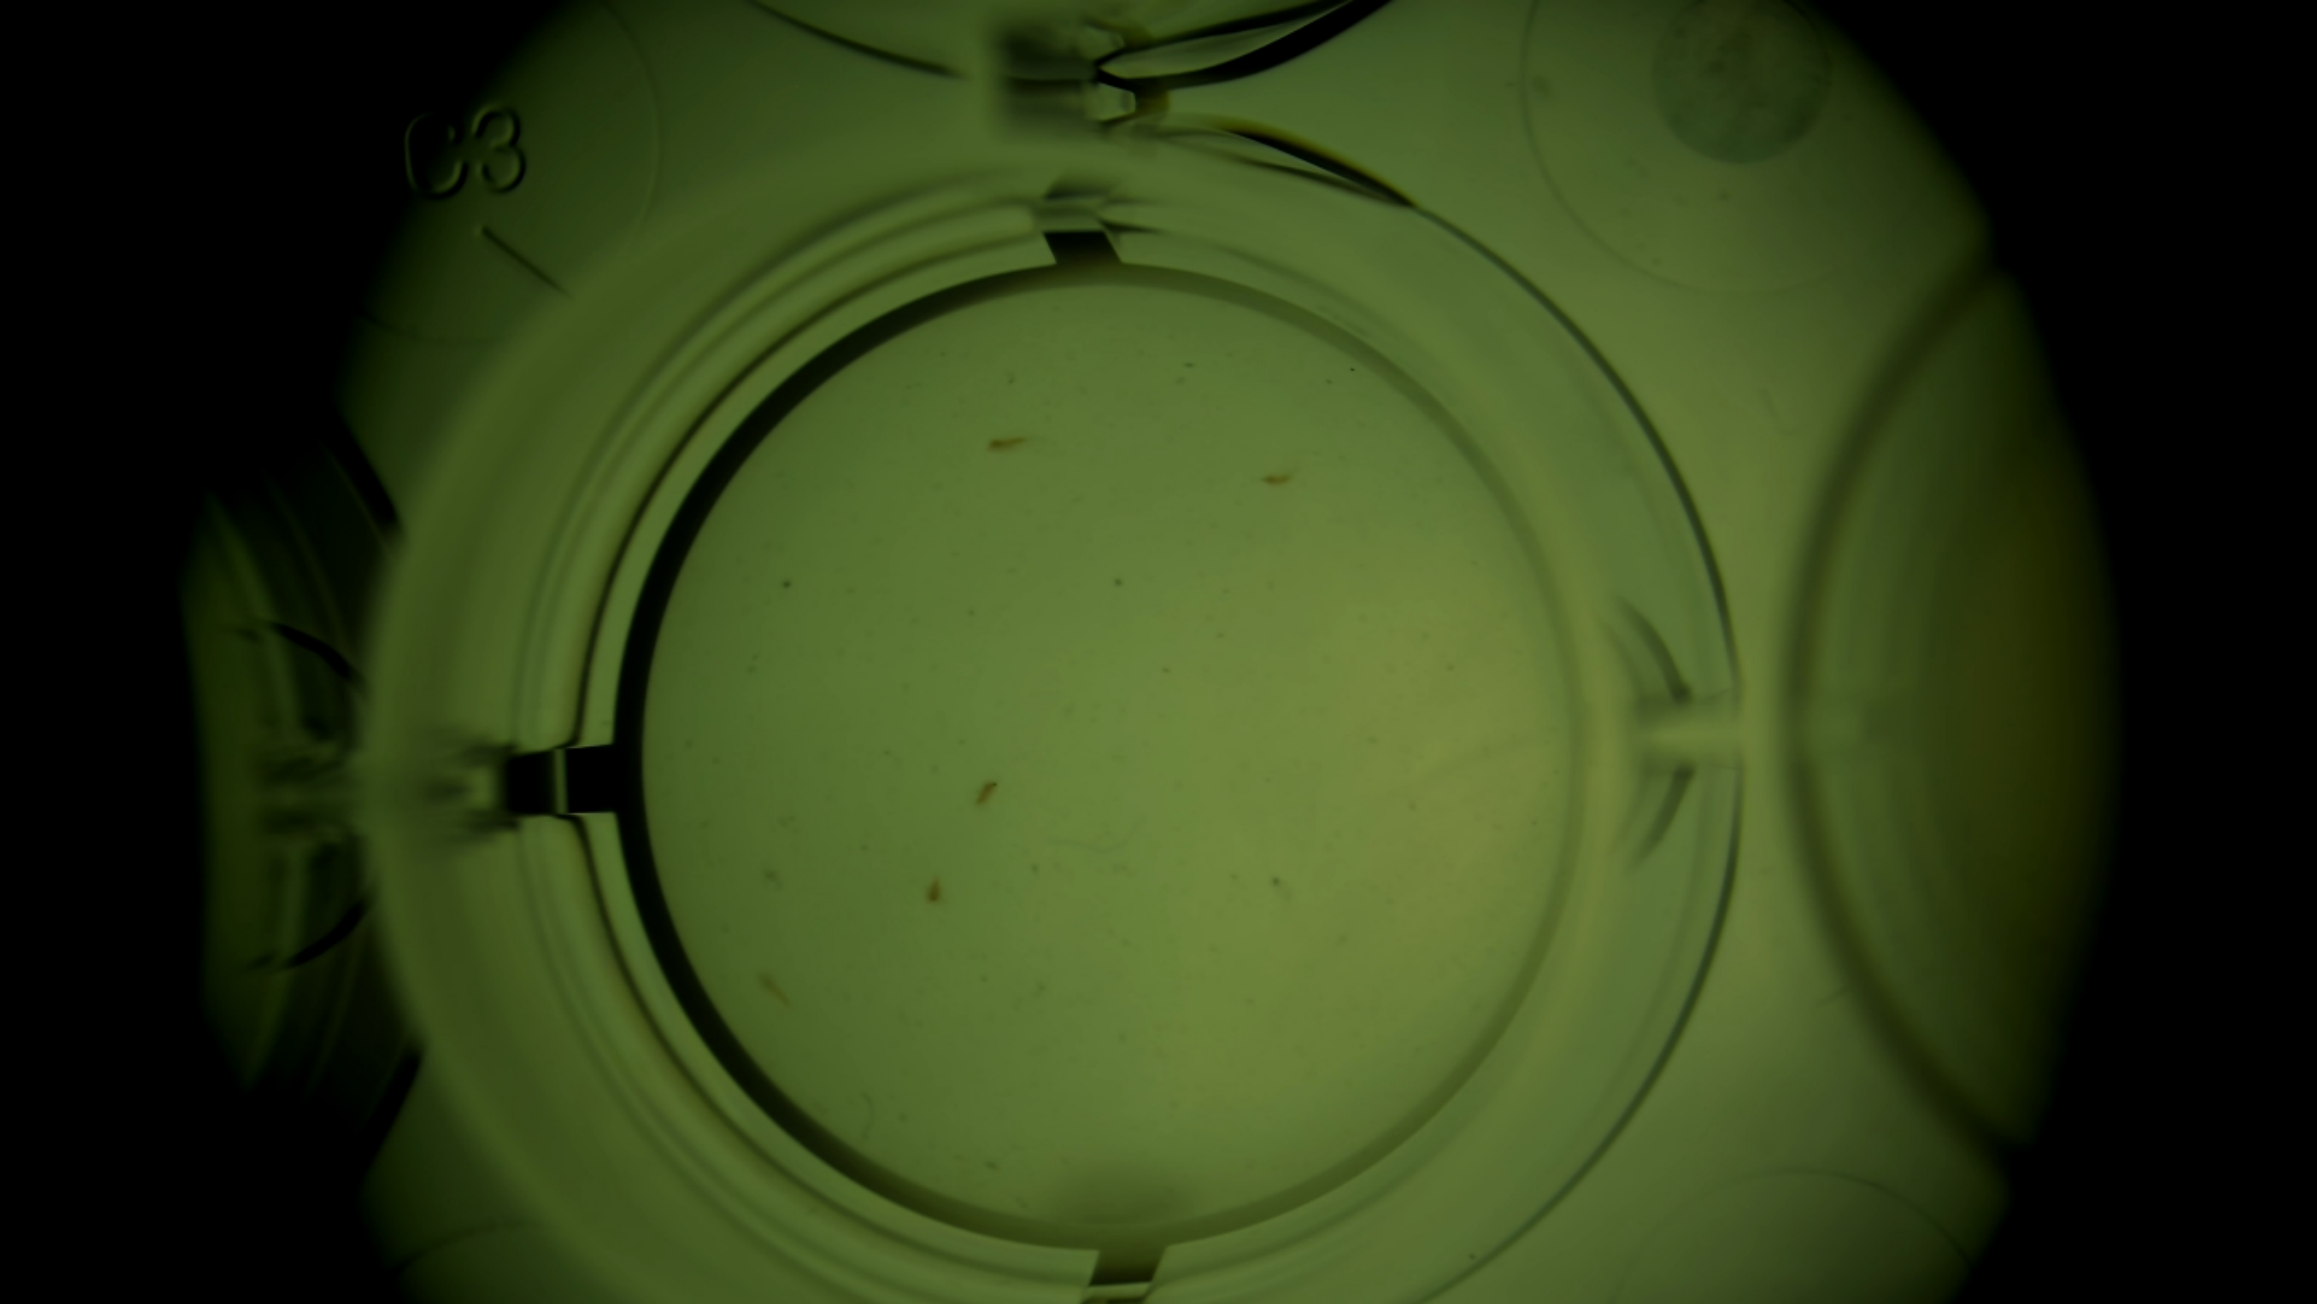

Supplement: d4na00013g2.pdf [file d4na00013g2.pdf]
